# Supplementary material for: Synthesis of thioamide containing polybenzoxazines by the Willgerodt–Kindler reaction
Source: Royal Society of Chemistry journal article supplement (doi:10.1039/d0py01381a), 2020-12-10
Supplement: d0py01381a1.pdf [file d0py01381a1.pdf]

## Electronic Supplementary material (ESI) for Polymer Chemistry

# Synthesis of thioamide containing polybenzoxazines by the Willgerodt–Kindler Reaction

Kamer Bayram<sup>1</sup>, Baris Kiskan<sup>1,\*</sup>, Yusuf Yagci<sup>1,\*</sup>

<sup>1</sup> *Istanbul Technical University, Department of Chemistry, 34469, Maslak, Istanbul, Turkey.*

### Contents:

#### Synthesis of Bis(VaBz)-Hex

#### Attempt to synthesize of main chain polybenzoxazine precursors

**Figure S1:** <sup>1</sup>H NMR spectrum of Bis(VaBz)-Hex

**Figure S2:** FTIR spectrum of Bis(VaBz)-Hex

**Figure S3:** <sup>1</sup>H NMR spectrum of the DMSO-d<sub>6</sub> soluble sample from one-pot main-chain polybenzoxazine synthesis experiment.

**Figure S4:** <sup>1</sup>H NMR spectra of 4-hydroxy-*N*-phenylbenzothioamide (monohydroxythioamide) (a) and 4-hydroxy-*N*-(4-hydroxyphenyl)benzothioamide (dihydroxythioamide) (b)

**Figure S5:** FTIR spectra of monohydroxythioamide (a) and dihydroxythioamide (b).

**Figure S6:** <sup>13</sup>C NMR spectrum of Th-amd-MonoBz-Bn

**Figure S7:** <sup>13</sup>C NMR spectrum of Th-amd-MonoBz-Fr

**Figure S8:** <sup>13</sup>C NMR spectrum of Th-amd-DiBz-Bn

**Figure S9:** FTIR spectra of Th-amd-MonoBz-Bn (a), Th-amd-MonoBz-Fr (b), Th-amd-DiBz-Bn (c).

**Figure S10:** LS/MS results with MS Spectrum Peak List for Th-amd-MonoBz-Bn

**Figure S11:** LS/MS results with MS Spectrum Peak List for Th-amd-DiBz-Bn

**Figure S12:** FTIR spectrum of poly(thioamide-benz-PPEO)

**Figure S13:** <sup>1</sup>H NMR spectrum of extracted sample from cured Th-amd-MonoBz-Bn

### **Synthesis of Bis(VaBz)-Hex**

In a 500 ml round-bottom flask, 4-hydroxy-3-methoxybenzaldehyde (vanillin) (30g, 0.197 mol), 1,6-diaminohexane (11.457g, 0.0986 mol ) and paraformaldehyde (11.842 g, 0.394 mol ) were added in 250 ml chloroform. The mixture was magnetically stirred under reflux for 24 h. After cooling the content of the flask, the solution was extracted with 0.3 M sodium hydroxide for five times ( $V_{\text{total}} = 1000 \text{ mL}$ ). Then, to neutralize the solution, chloroform solution was washed with distilled water ( $V_{\text{total}} = 500 \text{ mL}$ ) for three times. The solution was dried with anhydrous  $\text{Na}_2\text{SO}_4$  and then filtered. Chloroform was evaporated with a rotary. Then the remaining product was dried under vacuum at 40 °C for 24 h. (Yield: *ca.* 36%)

### **Attempt to synthesize of main chain polybenzoxazine precursors**

Typical procedure as follows: 1,6-diaminohexane (20 mmol, 0.2324 g) (or Jeffamine ED900 (20 mmol , 1.8g)), elemental sulfur (5 mmol, 0.160 g) were added in 10 mL DMAc in round bottom flask under nitrogen gas. After stirring the content for 20 min., Bis(VaBz)-Hex (20 mmol, 0.937g, dissolved in 7 mL DMAc) was added into the mixture. The whole mixture heated at 100 °C for 6h under nitrogen blanket. Then, the reaction content was cooled down to ambient temperature and poured into methanol (*ca.* 100 mL) dropwise. After keeping the MeOH solution in a refrigerator for 24 h, precipitated product (polymer) was filtered and washed with cold methanol. The polymer was dried at ambient temperature in a vacuum chamber for 24 h.

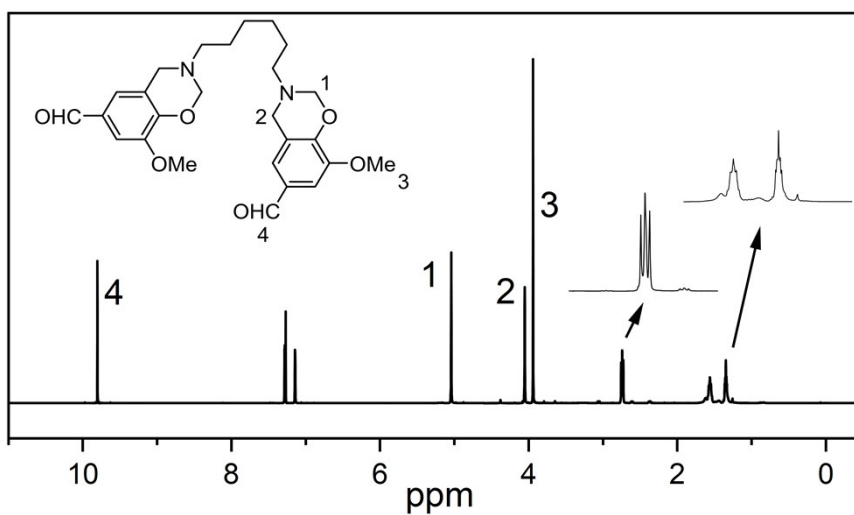

**Figure S1:**  $^1\text{H}$  NMR spectrum of Bis(VaBz)-Hex

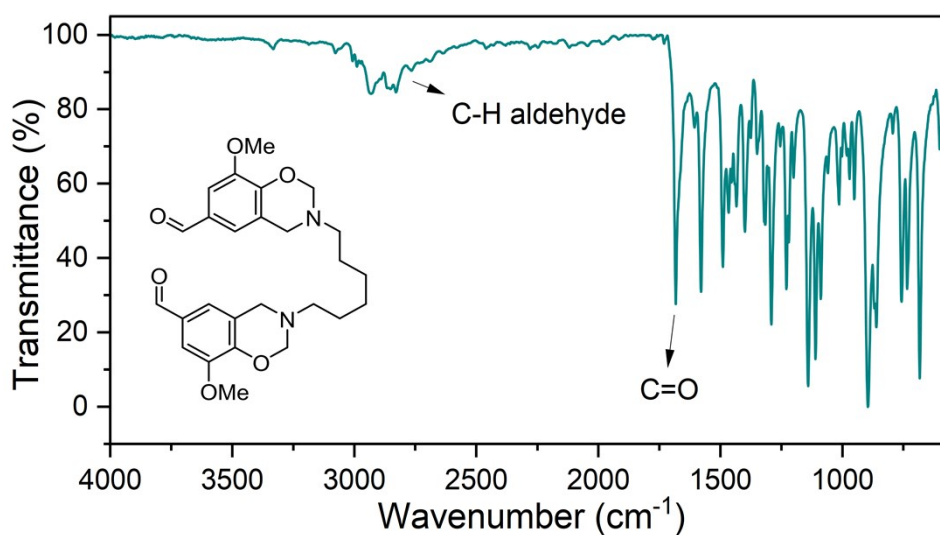

**Figure S2:** FTIR spectrum of Bis(VaBz)-Hex

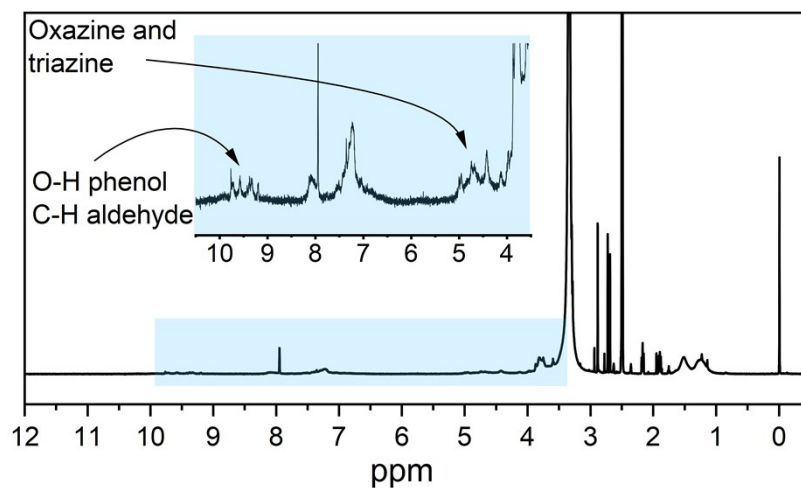

**Figure S3:**  $^1\text{H}$  NMR spectrum of the  $\text{DMSO-d}_6$  soluble sample from one-pot main chain polybenzoxazine synthesis experiment

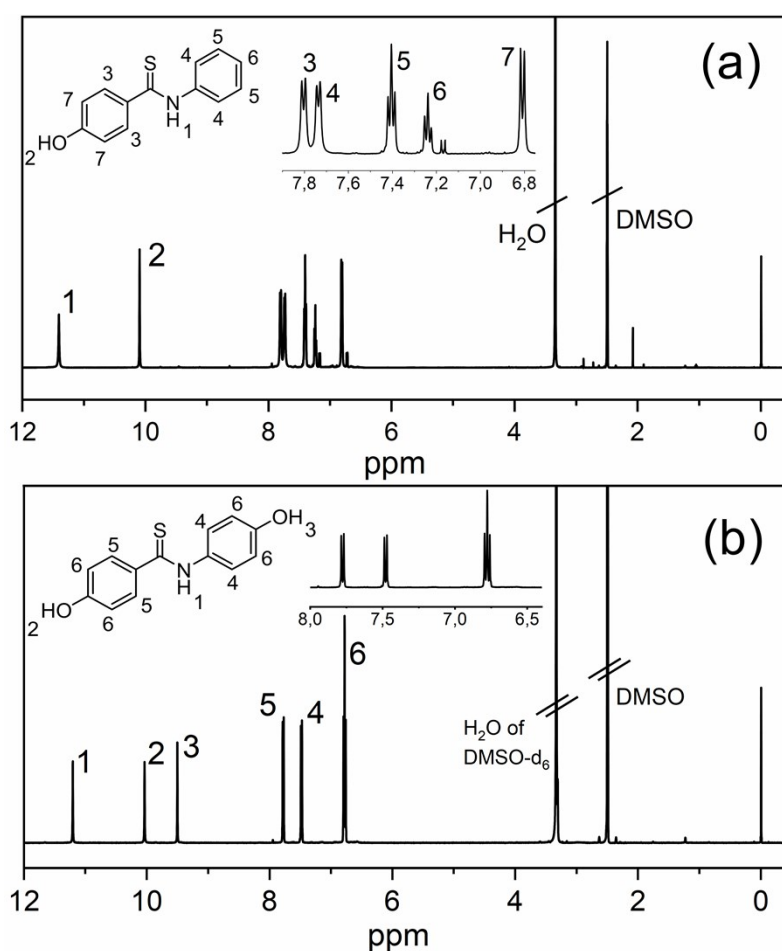

**Figure S4:**  $^1\text{H}$  NMR spectra of 4-hydroxy-*N*-phenylbenzothioamide (monohydroxythioamide) (a) and 4-hydroxy-*N*-(4-hydroxyphenyl)benzothioamide (dihydroxythioamide) (b)

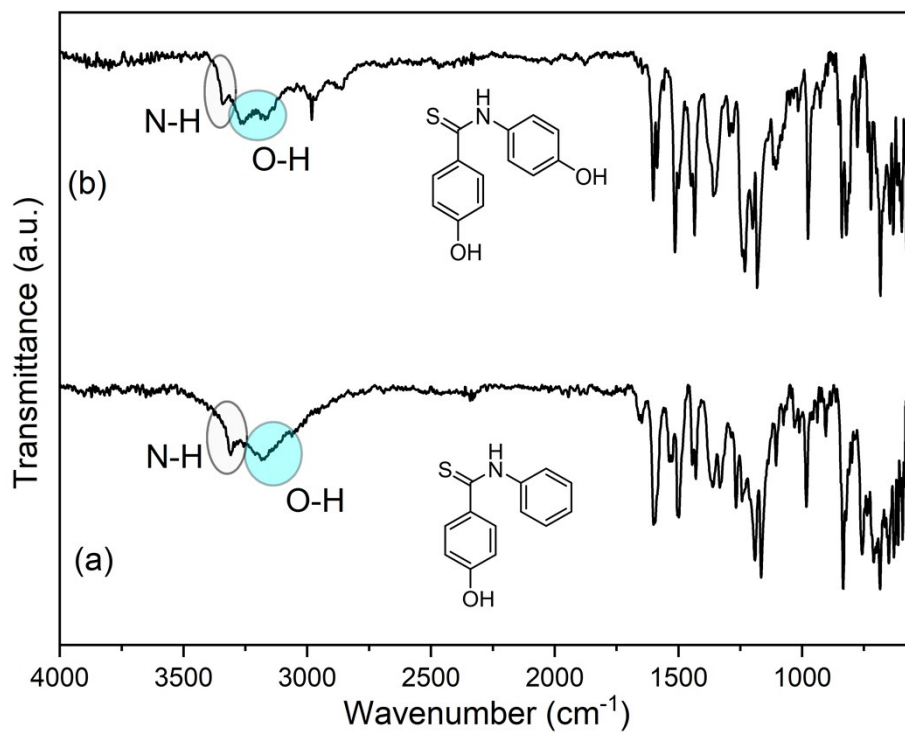

**Figure S5:** FTIR spectra of monohydroxythioamide (a) and dihydroxythioamide (b).

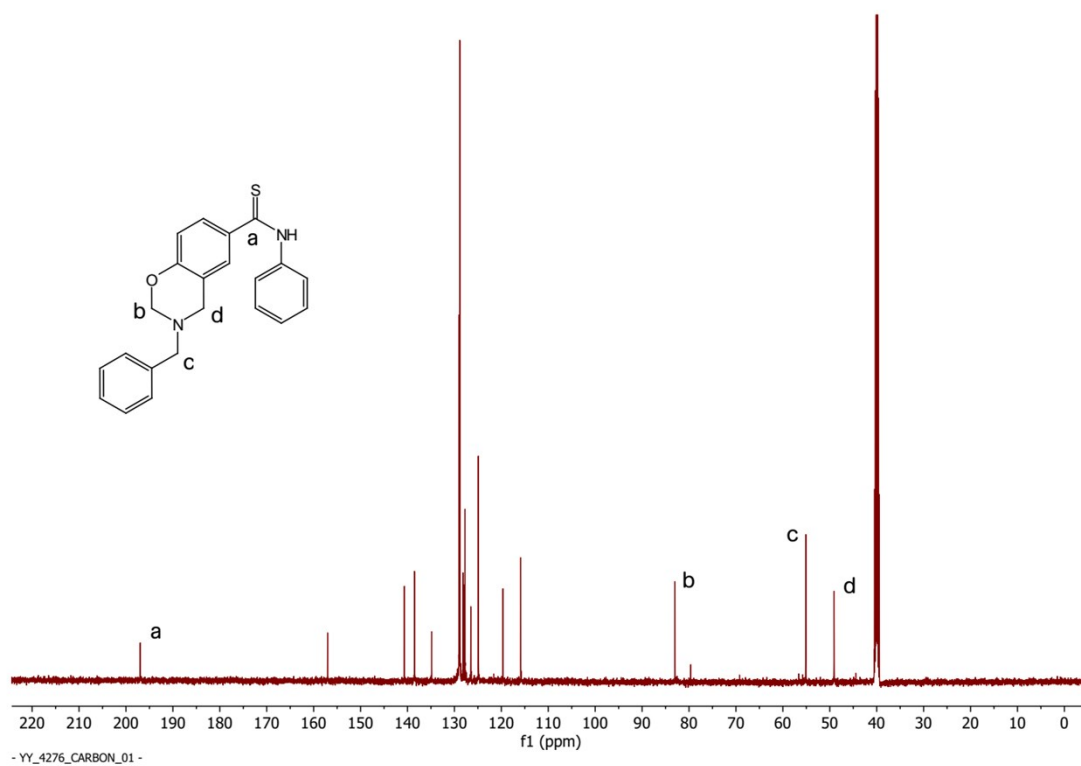

**Figure S6:** <sup>13</sup>C NMR spectrum of Th-amd-MonoBz-Bn

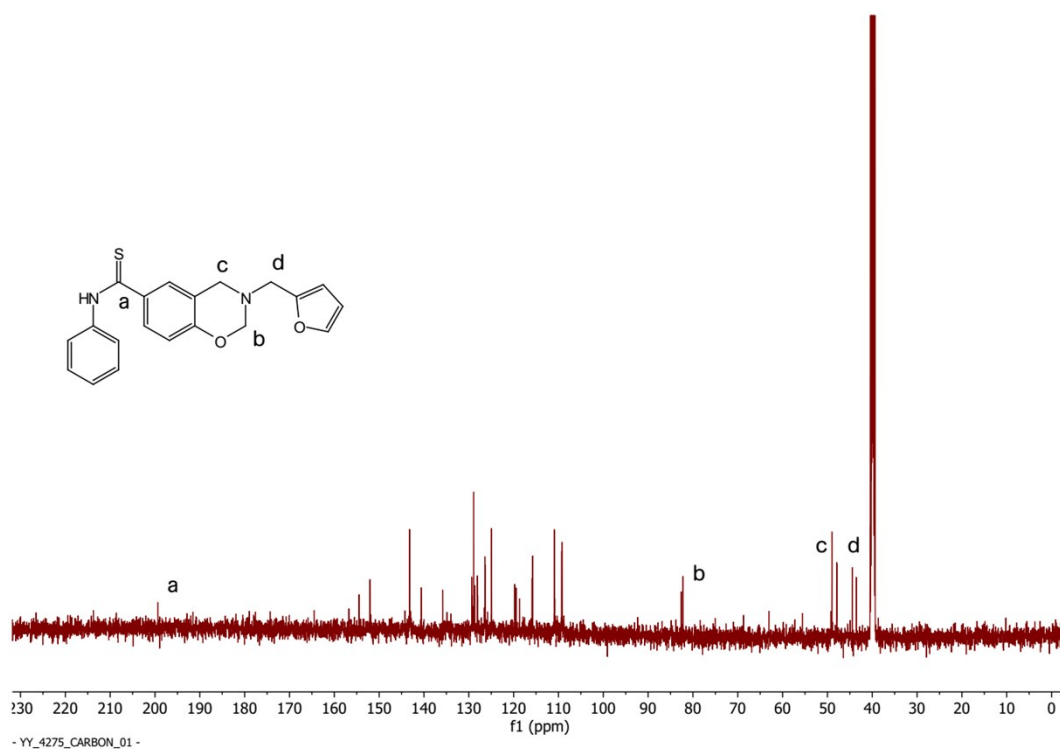

Figure S7: <sup>13</sup>C NMR spectrum of Th-amd-MonoBz-Fr

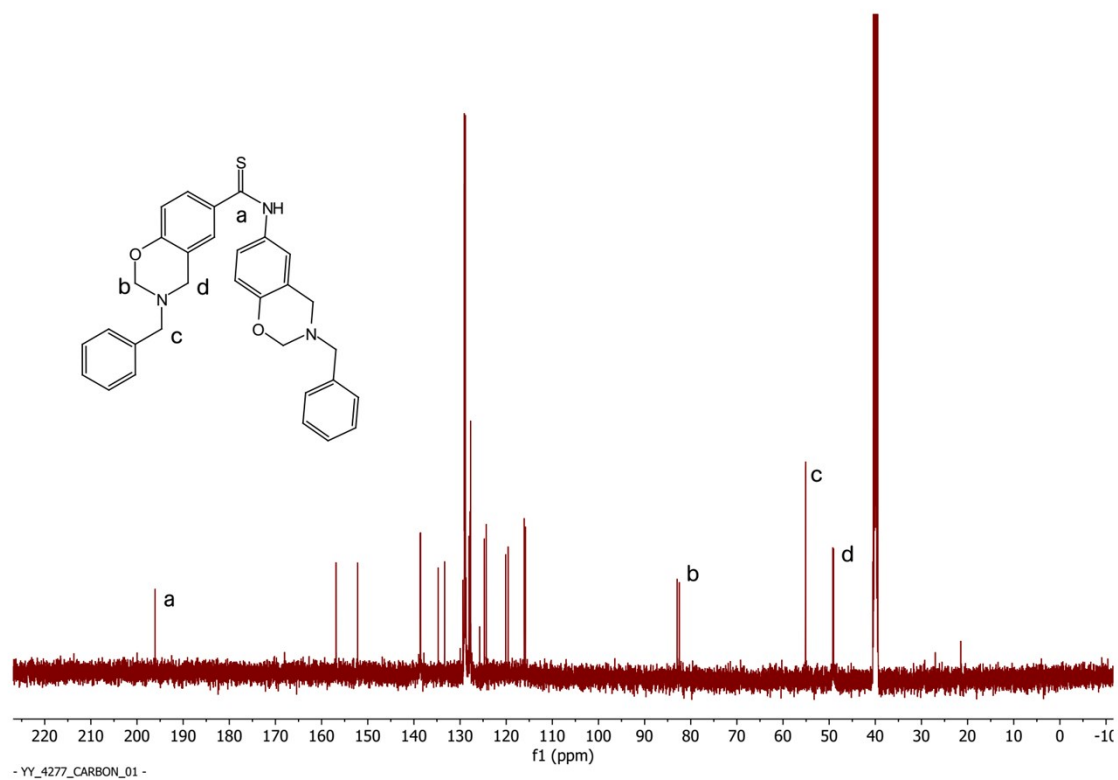

Figure S8: <sup>13</sup>C NMR spectrum of Th-amd-DiBz-Bn

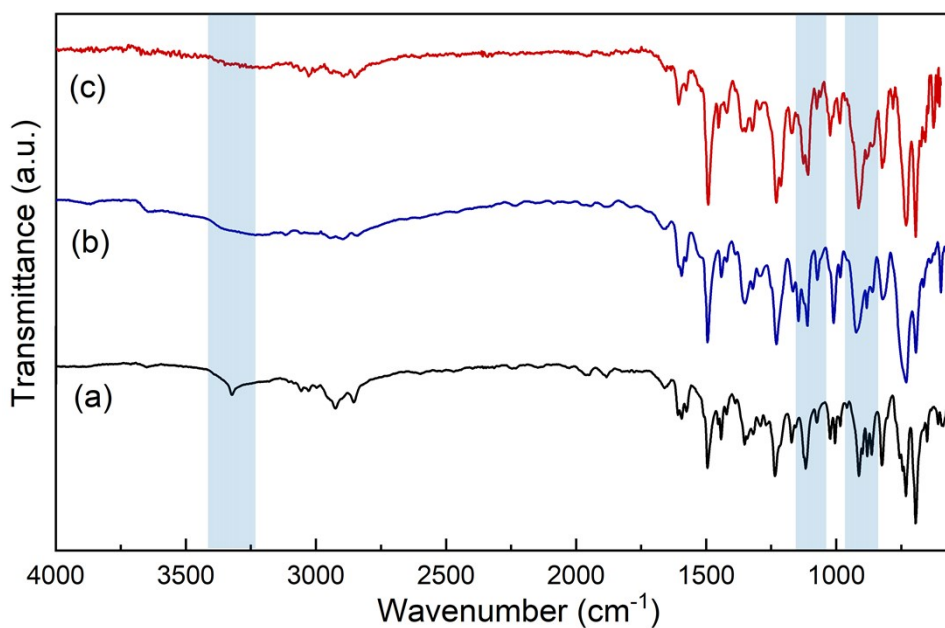

**Figure S9:** FTIR spectra of Th-amd-MonoBz-Bn (a), Th-amd-MonoBz-Fr (b), Th-amd-DiBz-Bn (c).

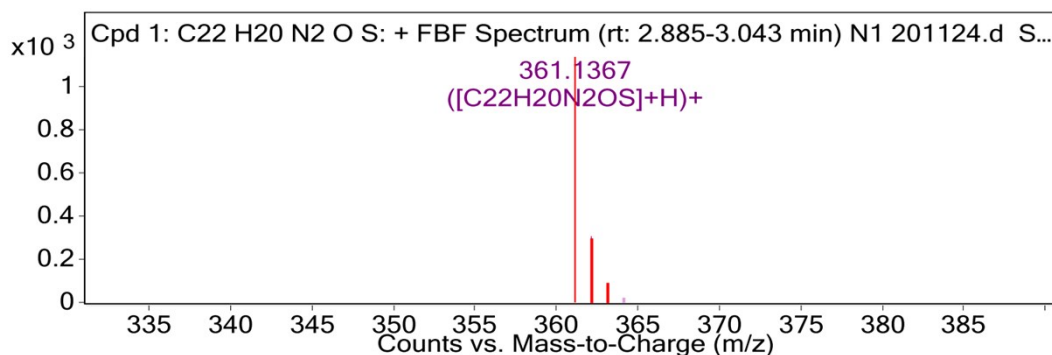

**MS Spectrum Peak List**

| <i>m/z</i> | <i>z</i> | Abund   | Formula    | Ion    |
|------------|----------|---------|------------|--------|
| 361,1367   | 1        | 1140,71 | C22H20N2OS | (M+H)+ |
| 362,139    | 1        | 307,86  | C22H20N2OS | (M+H)+ |
| 363,1299   | 1        | 56,06   | C22H20N2OS | (M+H)+ |

**Figure S10:** LS/MS results with MS Spectrum Peak List for Th-amd-MonoBz-Bn

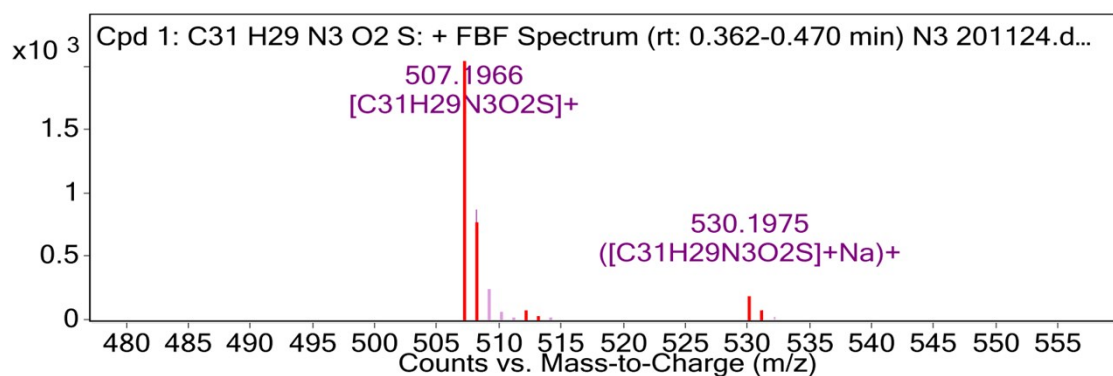

**MS Spectrum Peak List**

| m/z      | z | Abund  | Formula                                                         | Ion                        |
|----------|---|--------|-----------------------------------------------------------------|----------------------------|
| 507,1966 | 1 | 2041,8 | C <sub>31</sub> H <sub>29</sub> N <sub>3</sub> O <sub>2</sub> S | M <sup>+</sup>             |
| 508,1986 | 1 | 869,27 | C <sub>31</sub> H <sub>29</sub> N <sub>3</sub> O <sub>2</sub> S | M <sup>+</sup>             |
| 512,1753 | 1 | 63,53  | C <sub>31</sub> H <sub>29</sub> N <sub>3</sub> O <sub>2</sub> S | (M+Na)+[-H <sub>2</sub> O] |
| 513,1882 | 1 | 22,77  | C <sub>31</sub> H <sub>29</sub> N <sub>3</sub> O <sub>2</sub> S | (M+Na)+[-H <sub>2</sub> O] |
| 530,1975 | 1 | 164,07 | C <sub>31</sub> H <sub>29</sub> N <sub>3</sub> O <sub>2</sub> S | (M+Na) <sup>+</sup>        |
| 531,2128 | 1 | 74,95  | C <sub>31</sub> H <sub>29</sub> N <sub>3</sub> O <sub>2</sub> S | (M+Na) <sup>+</sup>        |

**Figure S11:** LS/MS results with MS Spectrum Peak List for Th-amd-DiBz-Bn

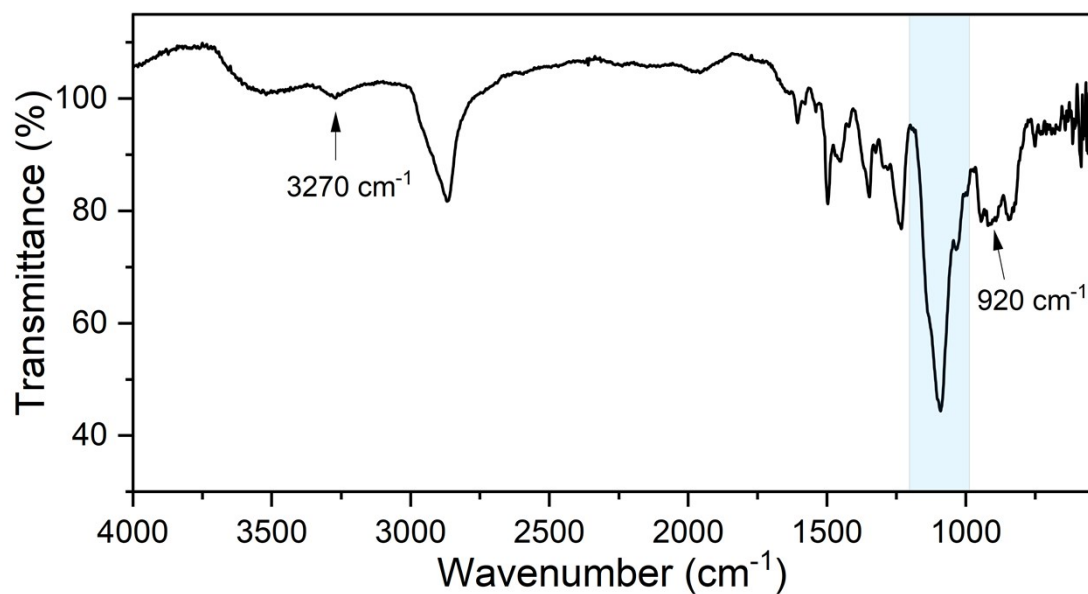

**Figure S12:** FTIR spectrum of poly(thioamide-benz-PPEO)



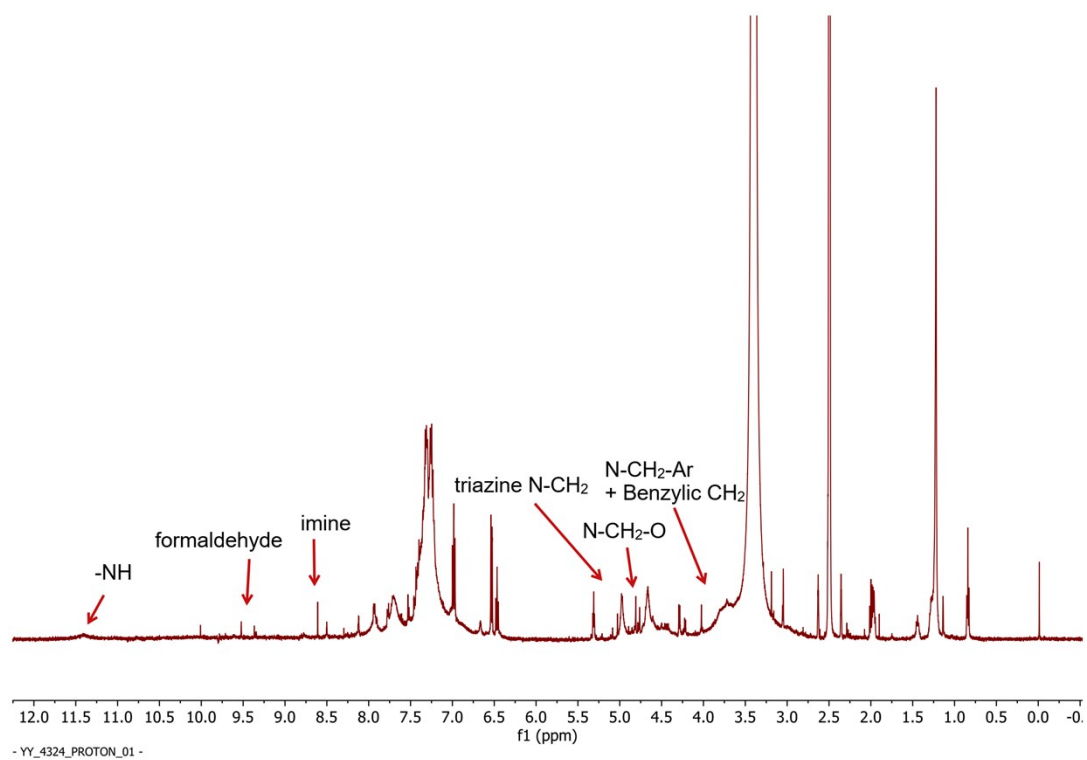

**Figure S13:**  $^1\text{H}$  NMR spectrum of extracted sample from cured Th-amd-MonoBz-Bn
